# Supplementary material for: Prediction of future gastric cancer risk using a machine learning algorithm and comprehensive medical check-up data: A case-control study
Source: PubMed Central journal article supplement (PMC6712020; doi:10.1038/s41598-019-48769-y), 2019-08-27
Supplement: 41598_2019_48769_MOESM1_ESM.pdf [file 41598_2019_48769_MOESM1_ESM.pdf]

## **Title**

**Prediction of future gastric cancer risk using a machine learning algorithm and comprehensive medical check-up data: A case-control study**

## **Authors**

Junichi Taninaga<sup>1</sup>, B.E., Yu Nishiyama<sup>1</sup>, Ph.D., Kazutoshi Fujibayashi<sup>2,4,5\*</sup>, M.D, Ph.D., Toshiaki Gunji<sup>3</sup>, M.D, Ph.D., Noriko Sasabe<sup>3</sup>, M.D, Ph.D., Kimiko Iijima<sup>3</sup>, M.D, Ph.D., Toshio Naito<sup>2</sup>, M.D, Ph.D.

## **Affiliations**

<sup>1</sup> Faculty of Informatics and Engineering, The University of Electro-Communications, Tokyo, Japan

<sup>2</sup> Department of General Medicine, School of Medicine, Juntendo University, Tokyo, Japan

<sup>3</sup> Center for Preventive Medicine, NTT Medical Center Tokyo, Tokyo, Japan

<sup>4</sup> Medical Technology Innovation Center, Juntendo University, Tokyo, Japan

<sup>5</sup> Clinical Research and Trial Center, Juntendo University Hospital, Tokyo, Japan

## **\*Corresponding Author**

Kazutoshi Fujibayashi

Department of General Medicine, School of Medicine, Juntendo University

3-1-3, Hongo, Bunkyo-Ku, Tokyo 113-8421, Japan

Tel/Fax: 81(3)-5802-1190

E-mail: [kfujiba@juntendo.ac.jp](mailto:kfujiba@juntendo.ac.jp)

Table S1. Results of predicting patients at risk of developing gastric cancer.

|         | TP <sup>a</sup> | FN <sup>b</sup> | FP <sup>c</sup> | TN <sup>d</sup> |
|---------|-----------------|-----------------|-----------------|-----------------|
| Model A | 12              | 3               | 86              | 186             |
| Model B | 15              | 0               | 103             | 169             |
| Model C | 13              | 2               | 87              | 185             |
| Model D | 15              | 0               | 68              | 204             |
| Model E | 14              | 1               | 63              | 209             |
| Model F | 0               | 15              | 0               | 272             |
| Model G | 0               | 15              | 0               | 272             |
| Model H | 15              | 0               | 105             | 167             |
| Model I | 0               | 15              | 2               | 270             |
| Model J | 9               | 6               | 27              | 245             |

<sup>a</sup> True Positive, TP

<sup>b</sup> False Negative, FN

<sup>c</sup> False Positive, FP

<sup>d</sup> True Negative, TN

**Figure S1.** Comparison of area under the curve (AUC) values between logistic regression and XGBoost in Models A and F.

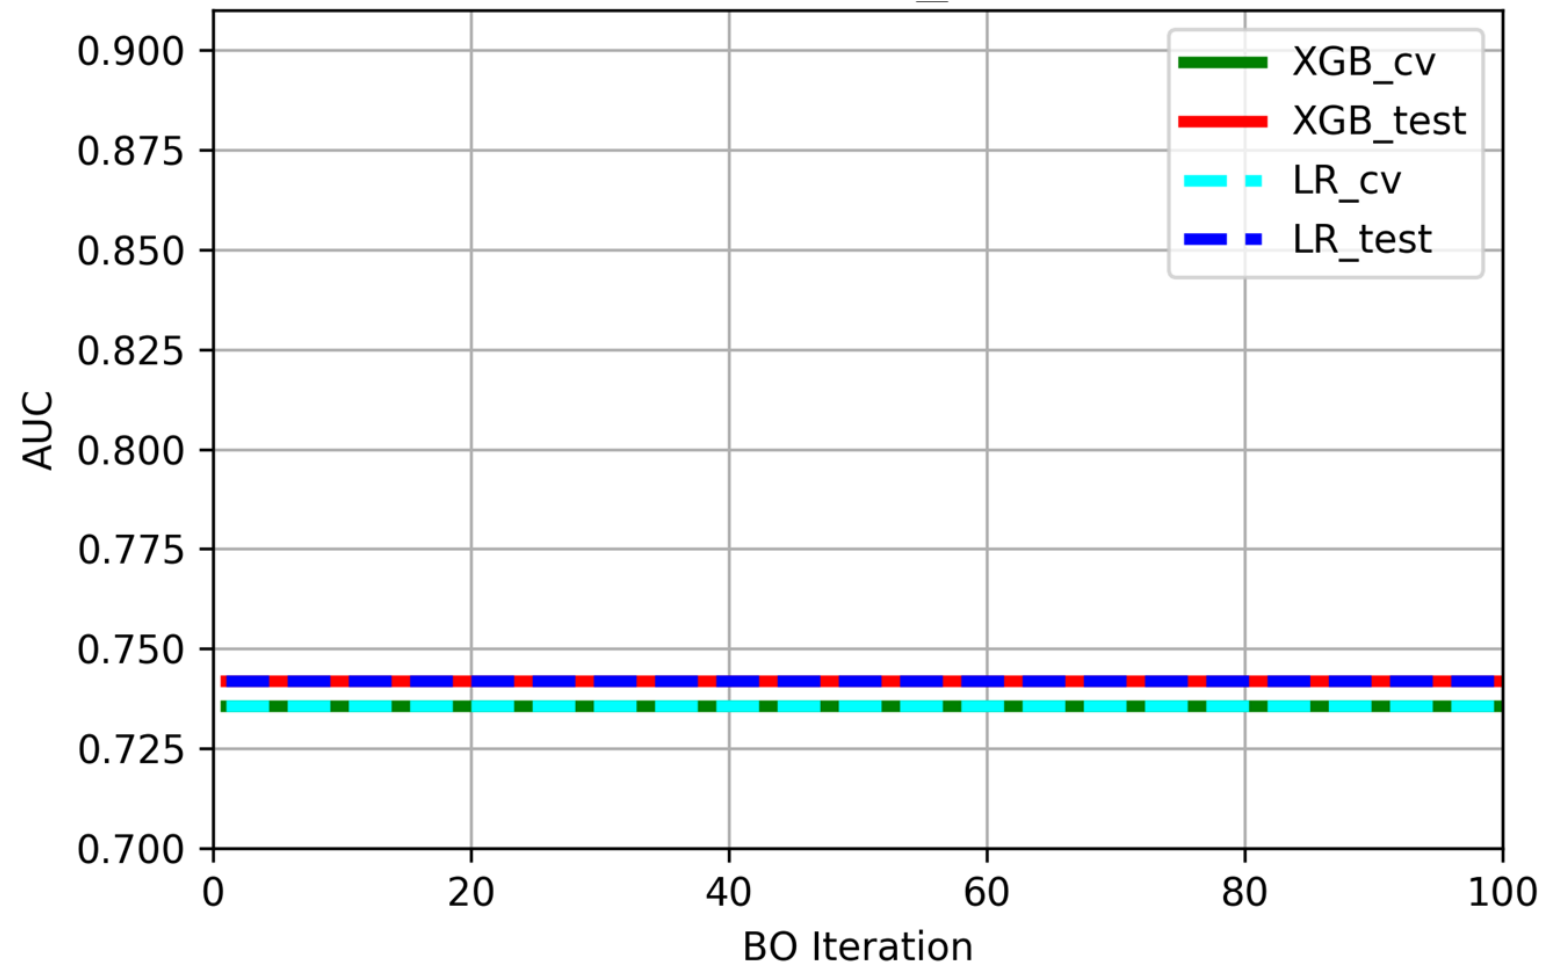

Bayesian optimisation (BO)

**Figure S2.** Comparison of area under the curve (AUC) values between logistic regression and XGBoost in Models B and G.

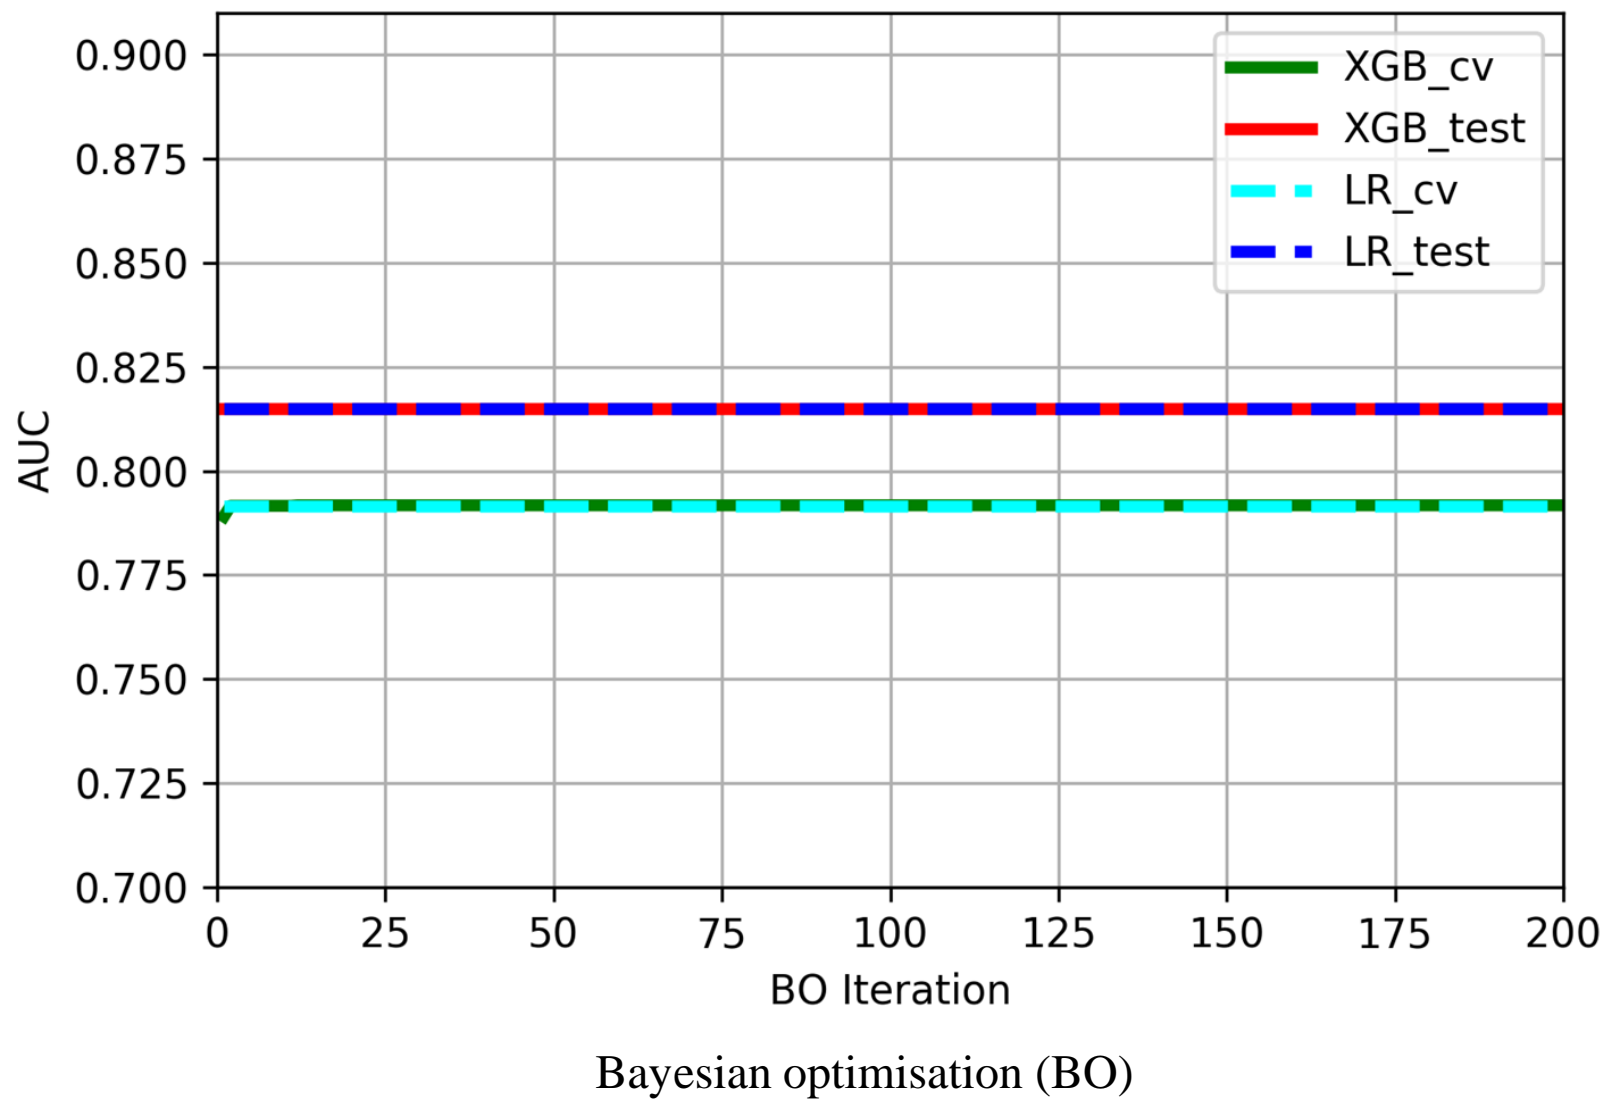

**Figure S3.** Comparison of area under the curve (AUC) values between logistic regression and XGBoost in Models C and H.

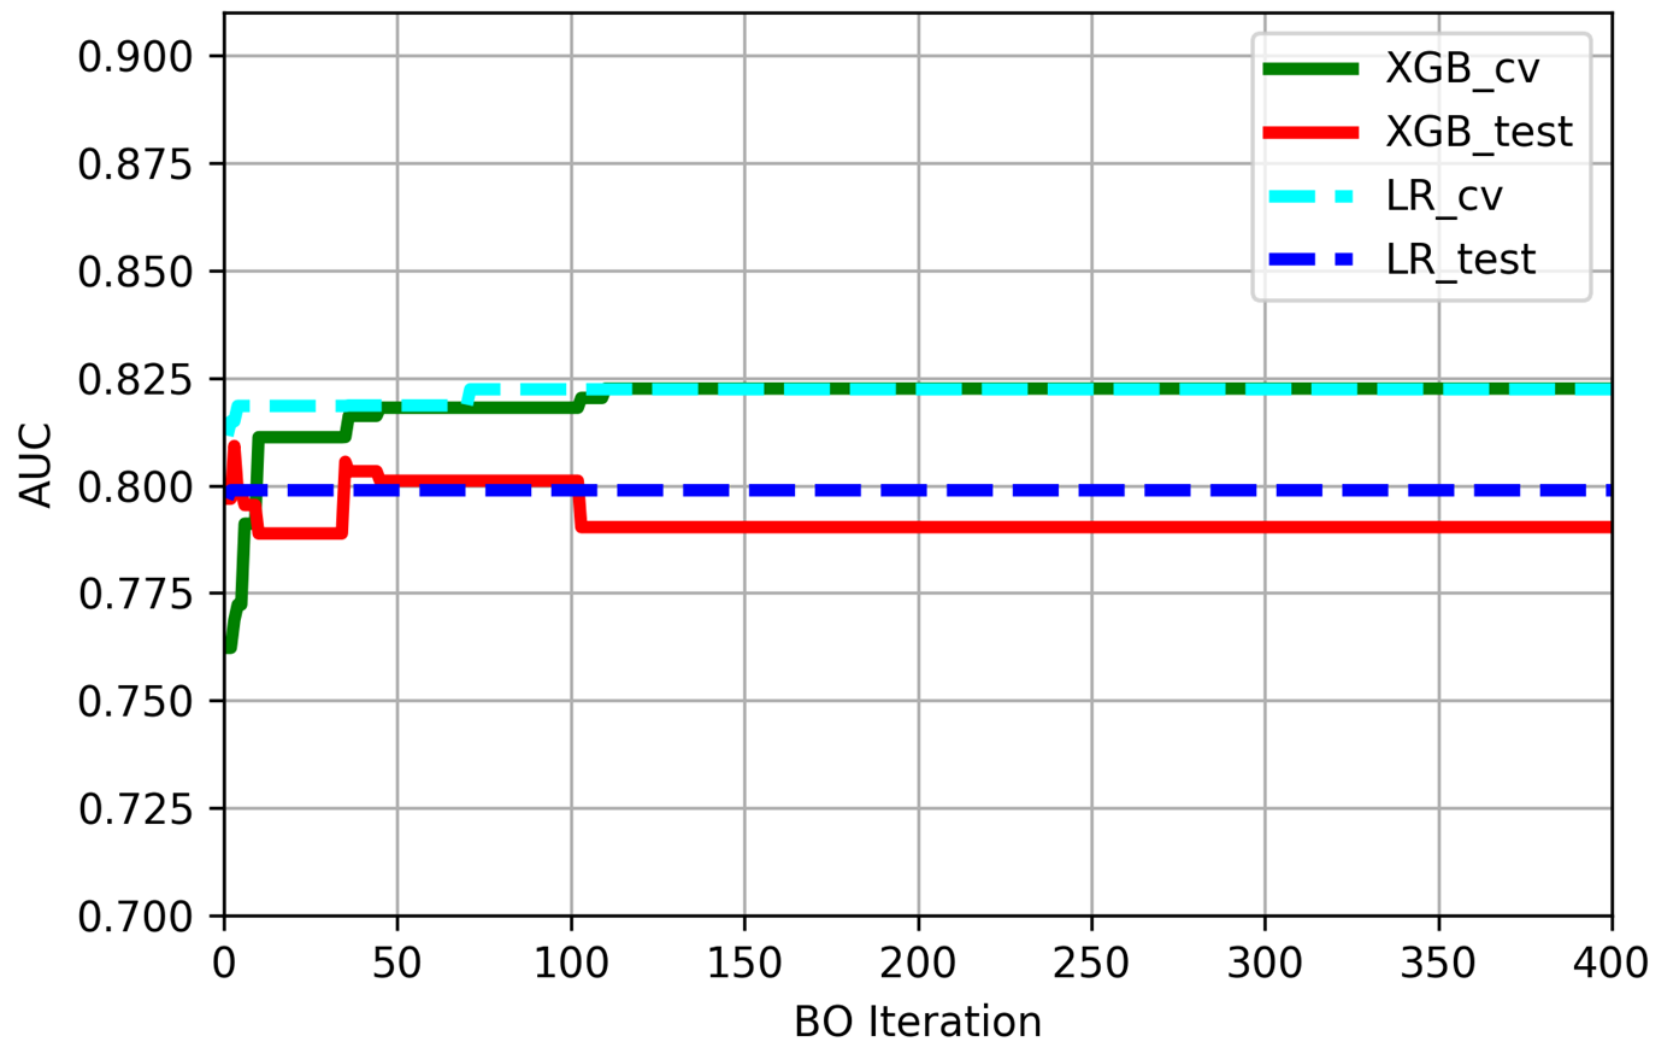

Bayesian optimisation (BO)

**Figure S4.** Comparison of area under the curve (AUC) values between logistic regression and XGBoost in Models D and I.

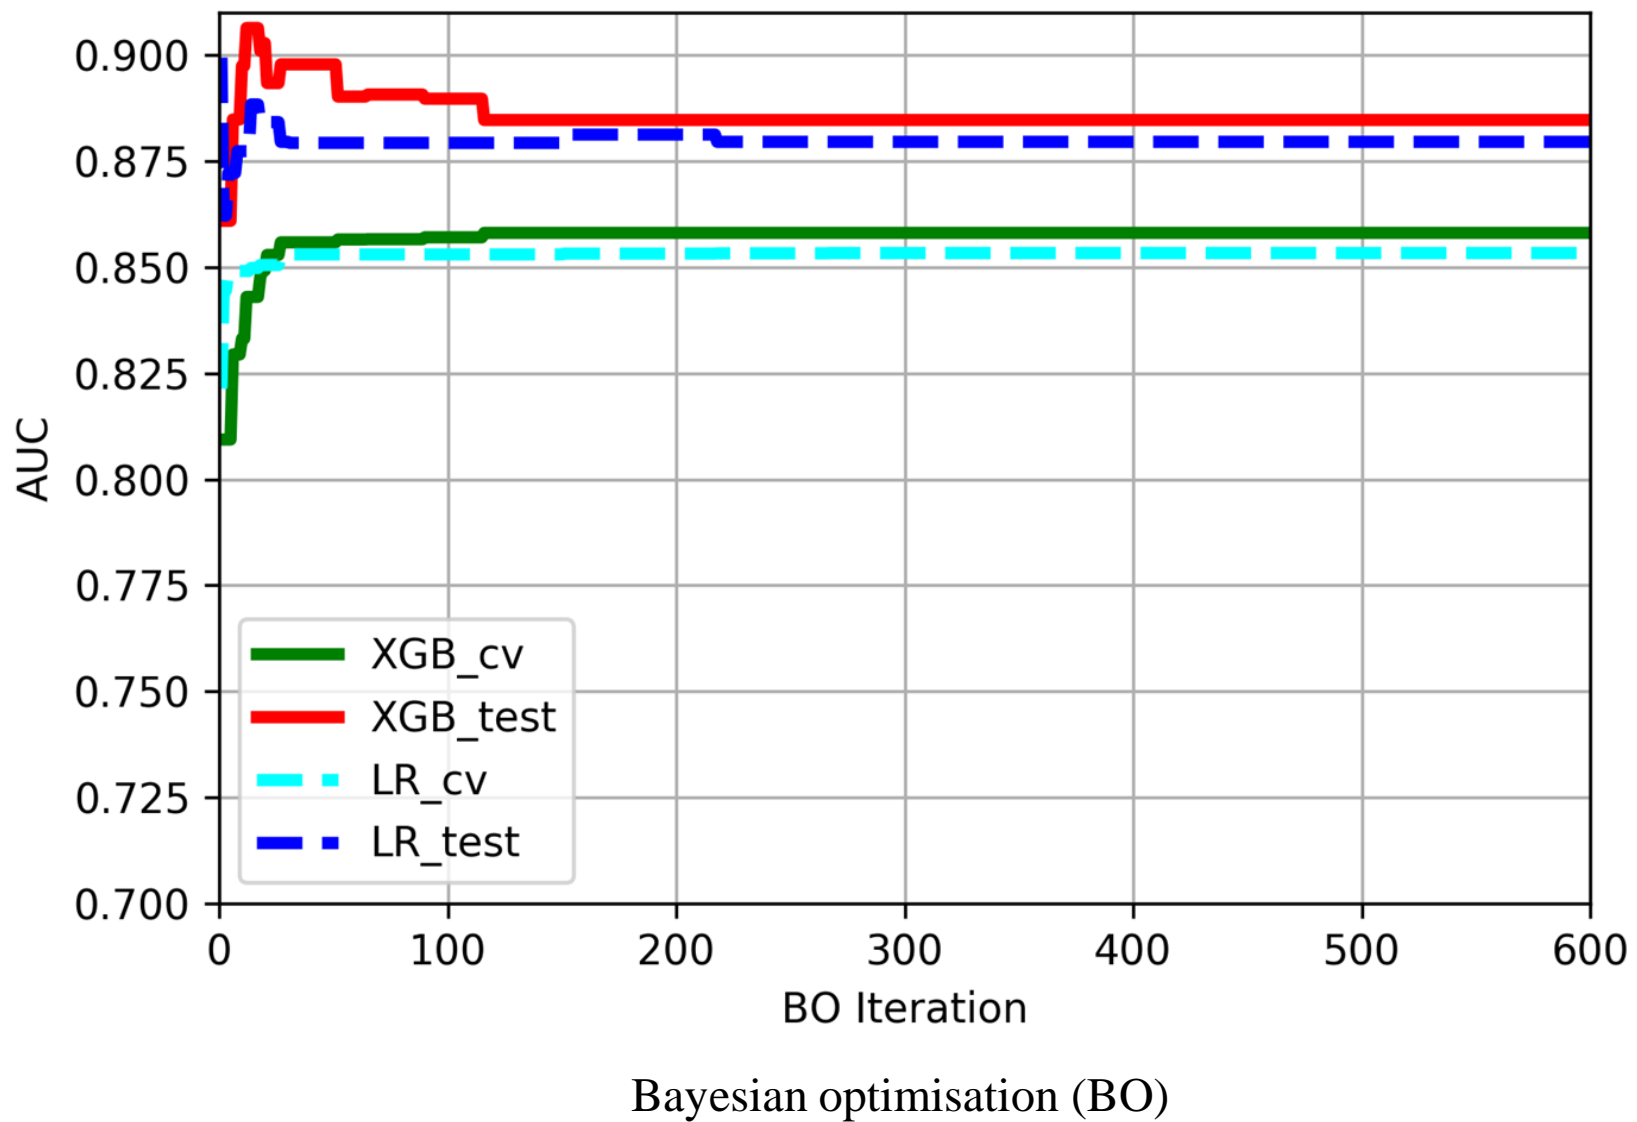

**Figure S5.** Comparison of area under the curve (AUC) values between logistic regression and XGBoost in Models E and J.

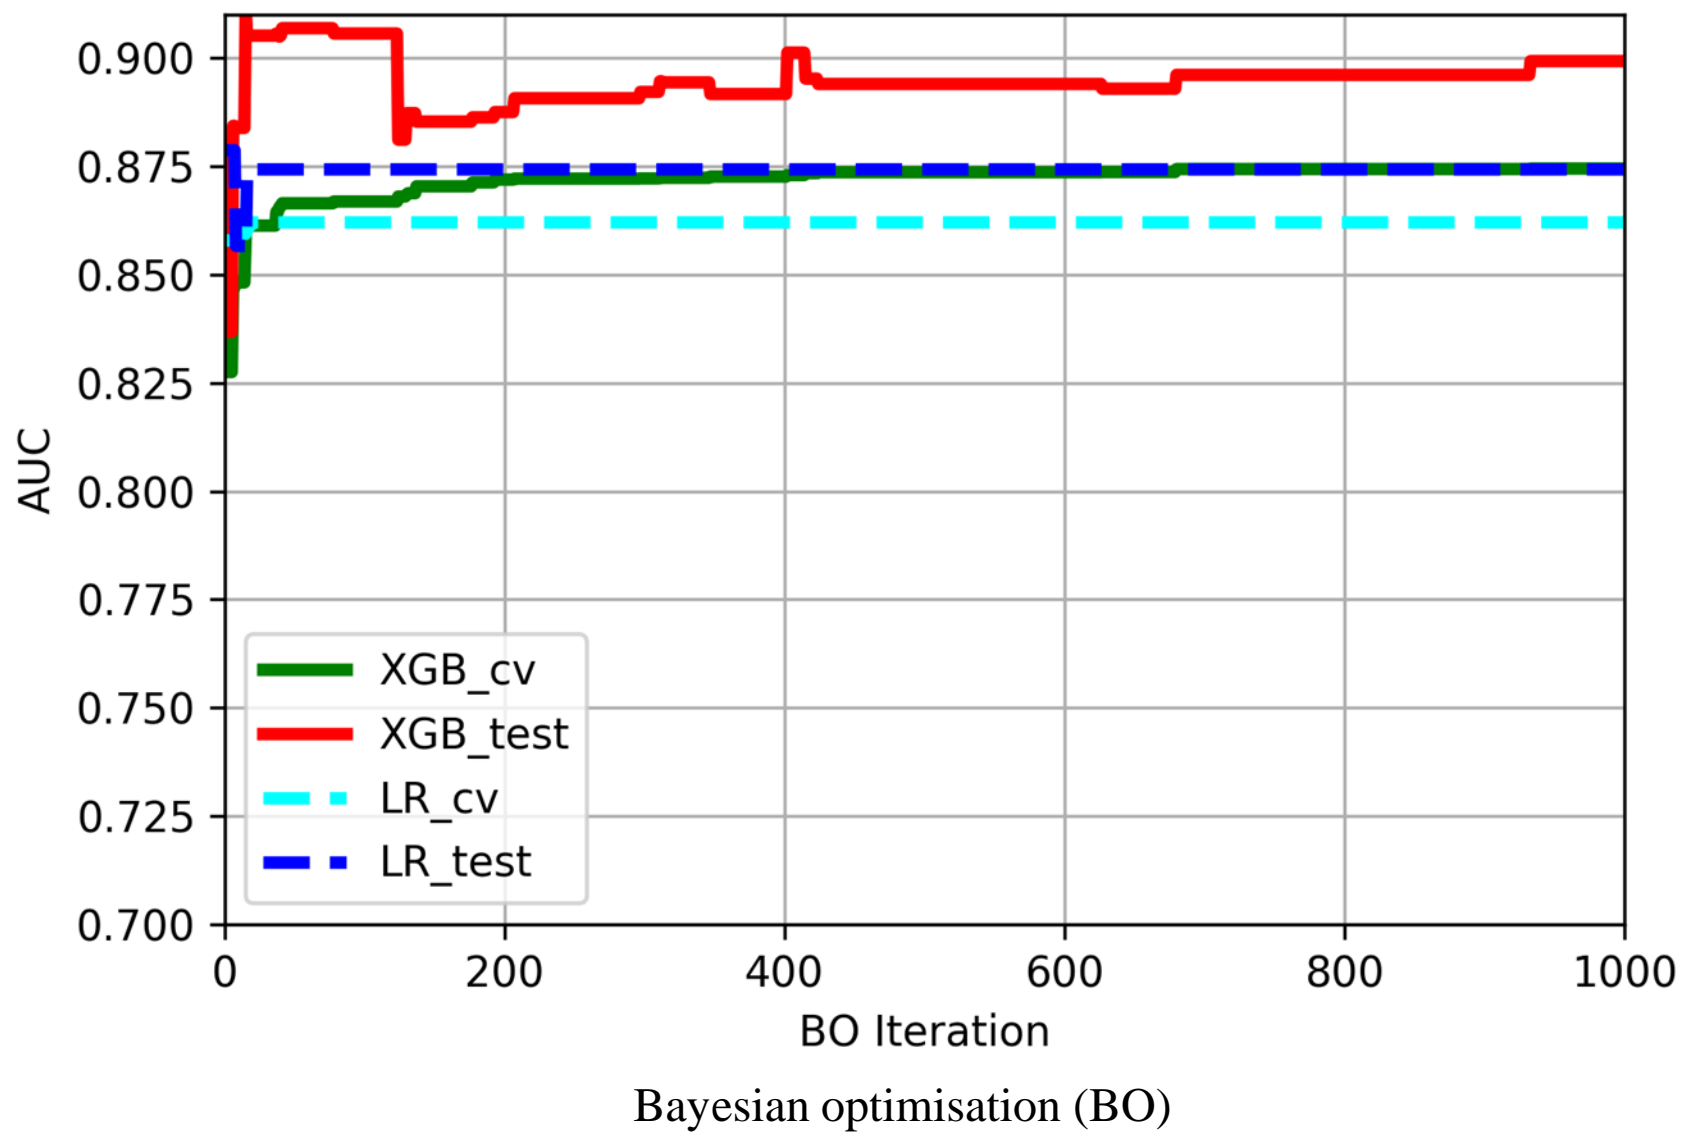

Table S2. Feature importance.

|         |                                                      |                                         |                                                        |                                         |                                                        |                                         |                      |                    |
|---------|------------------------------------------------------|-----------------------------------------|--------------------------------------------------------|-----------------------------------------|--------------------------------------------------------|-----------------------------------------|----------------------|--------------------|
| Model A | <i>H. pylori</i> <sup>a</sup><br>serology<br>testing |                                         |                                                        |                                         |                                                        |                                         |                      |                    |
|         | 1                                                    |                                         |                                                        |                                         |                                                        |                                         |                      |                    |
| Model B | Chronic<br>atrophic<br>gastritis                     | <i>H. pylori</i><br>serology<br>testing |                                                        |                                         |                                                        |                                         |                      |                    |
|         | 0.647                                                | 0.353                                   |                                                        |                                         |                                                        |                                         |                      |                    |
| Model C | Chronic<br>atrophic<br>gastritis                     | Post-<br>gastrectomy                    | Gastric or<br>duodenal<br>ulcers<br>including<br>scars | <i>H. pylori</i><br>serology<br>testing | GERD <sup>b</sup> or<br>Barrett's<br>oesophagus        |                                         |                      |                    |
|         | 0.308                                                | 0.226                                   | 0.185                                                  | 0.144                                   | 0.137                                                  |                                         |                      |                    |
| Model D | Age                                                  | Chronic<br>atrophic<br>gastritis        | <i>H. pylori</i><br>serology<br>testing                | Body mass<br>index                      | Gastric or<br>duodenal<br>ulcers<br>including<br>scars | Post-<br>gastrectomy                    | Sex                  |                    |
|         | 0.367                                                | 0.360                                   | 0.187                                                  | 0.067                                   | 0.013                                                  | 0.007                                   | 0.010                |                    |
| Model E | Age                                                  | Mean<br>corpuscular<br>volume           | Chronic<br>atrophic<br>gastritis                       | HbA1c                                   | Lymphocyte<br>ratio                                    | <i>H. pylori</i><br>serology<br>testing | Post-<br>gastrectomy | Body mass<br>index |
|         | 0.206                                                | 0.121                                   | 0.115                                                  | 0.091                                   | 0.091                                                  | 0.091                                   | 0.079                | 0.067              |

<sup>a</sup> *Helicobacter pylori*, *H. pylori*<sup>b</sup> Gastroesophageal reflux disease, GERD



Table S3. Distribution of participants according to the number of upper gastrointestinal endoscopies.

| Trials undergone | Patients with suspected gastric cancer | Patients without suspected gastric cancer |
|------------------|----------------------------------------|-------------------------------------------|
| n                | n                                      | n                                         |
| 1                | 0                                      | 0                                         |
| 2                | 36                                     | 49                                        |
| 3                | 19                                     | 48                                        |
| 4                | 4                                      | 81                                        |
| 5                | 5                                      | 105                                       |
| 6                | 9                                      | 130                                       |
| 7                | 6                                      | 111                                       |
| 8                | 5                                      | 131                                       |
| 9                | 1                                      | 143                                       |
| 10               | 1                                      | 155                                       |
| 11               | 3                                      | 233                                       |
| 12               | 0                                      | 155                                       |
| 13               | 0                                      | 0                                         |
| 14               | 0                                      | 1                                         |
